# Supplementary material for: Efficacy of the Piperidine Nitroxide 4-MethoxyTEMPO in Ameliorating Serum Amyloid A-Mediated Vascular Inflammation
Source: MDPI journal article supplement (doi:10.3390/ijms22094549), 2021-04-27
Supplement: s1 [file s1]

Table S1. Primer sequences

| Primer              | Forward Sequence (5'-3') | Reverse Sequence (3'-5') | NCBI Accession number |
|---------------------|--------------------------|--------------------------|-----------------------|
| <b>GAPDH</b>        | CTGGGCTACACTGAGCACC      | AAGTGGTCGTTGAGGGCAATG    | NM_001357943.2        |
| <b>VCAM-1</b>       | AATGCCTGGGAAGATGGTCG     | GATGTGGTCCCCTCATTCGT     | NM_001078.4           |
| <b>ICAM-1</b>       | TATAAAGGATCACGCGCCCC     | AACAACCTGGGCTGGTCACA     | NM_000201             |
| <b>E-Selectin</b>   | CTGGCAGTTCCGGGAAAGAT     | AGCCAGAGGAGAAATGGTGC     | NM_000450.2           |
| <b>NFκB-p65</b>     | GCGAGAGGAGCACAGATACC     | AGGGGTTGTTGTTGGTCTGG     | NM_001145138.1        |
| <b>JAM-C</b>        | GCAATCGAACCCCAAGTGGTA    | GTCACCTGGCTTCACTCAATTT   | NM_001205329.1        |
| <b>VE-Cadherin</b>  | CACGCCTCTGTCATGTACCA     | TGTACTTGGTCTGGGTGAAGA    | NM_001795.5           |
| <b>P120 Catenin</b> | GGGCCAAGAAGGGCAAAGA      | GCTGAGGCTTCTAGGATGGC     | NM_001085458.2        |
| <b>ESAM</b>         | TAAGCCCGCTGTCCAATACC     | TGGGCCTTGCAGACATAGAC     | NM_138961.3           |

Primer sequences utilized in mRNA analysis via qPCR. Primers were synthesized by Integrated DNA Technologies (Coralville, Iowa, USA). All primers were first checked for suitability in target species using the NCBI NIH PrimerBLAST system (available at <https://www.ncbi.nlm.nih.gov/tools/primer-blast/>). Subject to their suitability the primers were then QC checked using the Sequence Manipulation Suite available at ([www.bioinformatics.org/sms2/pcr\\_primer\\_stats.html](http://www.bioinformatics.org/sms2/pcr_primer_stats.html)) prior to their use.
